# Supplementary material for: Impact of Red Imported Fire Ant Nest-Building on Soil Properties and Bacterial Communities in Different Habitats
Source: MDPI journal article supplement (doi:10.3390/ani13122026), 2023-06-18
Supplement: s1 [file s1]

| ID         | domain | phylum | class | order | family | genus | species | unclassified |      |
|------------|--------|--------|-------|-------|--------|-------|---------|--------------|------|
| total ASVs |        |        |       |       |        |       |         |              |      |
| TS-N_1     | 24     | 12     | 74    | 395   | 693    | 2161  | 157     | 1            | 3517 |
| TS-N_2     | 19     | 20     | 80    | 437   | 773    | 2424  | 184     | 1            | 3938 |
| TS-N_3     | 36     | 20     | 84    | 434   | 673    | 2299  | 178     | 1            | 3725 |
| TS-CK_1    | 10     | 13     | 45    | 382   | 641    | 2583  | 102     | 0            | 3776 |
| TS-CK_2    | 13     | 13     | 35    | 314   | 594    | 2405  | 112     | 1            | 3487 |
| TS-CK_3    | 19     | 14     | 54    | 347   | 713    | 2769  | 140     | 0            | 4056 |
| BS-N_1     | 6      | 6      | 51    | 112   | 438    | 1831  | 184     | 0            | 2628 |
| BS-N_2     | 8      | 8      | 54    | 110   | 482    | 1990  | 201     | 0            | 2853 |
| BS-N_3     | 6      | 4      | 53    | 137   | 455    | 1982  | 222     | 0            | 2859 |
| BS-CK_1    | 3      | 8      | 36    | 76    | 327    | 1355  | 143     | 0            | 1948 |
| BS-CK_2    |        | 2      | 12    | 30    | 61     | 314   | 1439    | 124          | 1982 |
| BS-CK_3    |        | 7      | 12    | 38    | 85     | 375   | 1378    | 141          | 2037 |
| LS-N_1     | 33     | 20     | 106   | 320   | 779    | 2241  | 178     | 0            | 3677 |
| LS-N_2     | 12     | 11     | 61    | 237   | 542    | 1776  | 147     | 0            | 2786 |
| LS-N_3     | 39     | 28     | 95    | 318   | 716    | 1972  | 146     | 1            | 3315 |
| LS-CK_1    | 35     | 24     | 67    | 345   | 602    | 2189  | 95      | 1            | 3358 |
| LS-CK_2    | 43     | 21     | 91    | 467   | 701    | 2788  | 109     | 0            | 4220 |
| LS-CK_3    | 49     | 24     | 87    | 371   | 799    | 2657  | 139     | 1            | 4127 |
| FS-N_1     | 19     | 6      | 86    | 415   | 592    | 1935  | 181     | 0            | 3234 |
| FS-N_2     | 6      | 6      | 77    | 419   | 546    | 1996  | 175     | 0            | 3225 |
| FS-N_3     | 27     | 9      | 70    | 366   | 562    | 1862  | 171     | 0            | 3067 |
| FS-CK_1    | 29     | 14     | 63    | 467   | 737    | 1995  | 112     | 0            | 3417 |
| FS-CK_2    | 23     | 9      | 50    | 480   | 768    | 1928  | 124     | 0            | 3382 |
| FS-CK_3    | 30     | 14     | 51    | 461   | 690    | 1884  | 138     | 0            | 3268 |
| RS-N_1     | 20     | 9      | 66    | 375   | 606    | 1765  | 135     | 1            | 2977 |
| RS-N_2     | 21     | 11     | 81    | 434   | 799    | 2105  | 144     | 1            | 3596 |
| RS-N_3     | 22     | 5      | 72    | 399   | 806    | 2054  | 141     | 1            | 3500 |
| RS-CK_1    | 21     | 11     | 60    | 441   | 473    | 1705  | 65      | 1            | 2777 |
| RS-CK_2    | 23     | 11     | 56    | 379   | 459    | 1637  | 63      | 3            | 2631 |
| RS-CK_3    | 19     | 6      | 45    | 428   | 455    | 1636  | 90      | 2            | 2681 |
